# Supplementary material for: The invariant chain transports TNF family member CD70 to MHC class II compartments in dendritic cells
Source: Oxford University Press journal article supplement (doi:10.1242/jcs.068510), 2010-10-22
Supplement: jcs068510tables1.pdf [file jcs068510tables1.pdf]

**Table S1.** Amino acids sequences of human and mouse li isoforms. In this study, we have used a cDNA construct encoding the p33 isoform of human li that ordinarily arises from p35 (isoform 2b, NCBI) mRNA by the use of an alternative translational start site. The start methionine of p33 is indicated in bold. In p33, the arginine-rich amino-terminal sequence (underlined) is lacking that contains an ER retention motif. In human p43 and mouse p41 the additional sequence that is encoded by exon 6b and discriminates them from p35 and p31 respectively, is underlined. The transmembrane domain is highlighted in each li protein. All depicted li species have the lysosomal targeting motifs. Literature references to cited information are given in the manuscript text.

#### Human li isoform a (p43)

TM

```

1 mhrrrsrscr edqkpvmddq rdlisneql pmlgrrpgap eskcsrgaly tgfsilvtll
   61 lagqattayf lyqqqgrldk ltvtsqnlql enlrmklpkp pkpvskmrma tp11mqalpm
  121 galpqgpmqn atkygnmte d hvmhllqnad plkvypplkg sfpnlrhk ntmetidkwv
  181 feswmhhwll femsrhsleq kptdappkvl tkcqeevshi pavhpgsfrp kcdengnylp
  241 lqcygsigyc wcvfngte v pntsrgrghn csesleledp ssglgvtkqd lgpvpm

```

#### Human li isoform b (p35)

##### Start p33

```

1 mhrrrsrscr edqkpvmddq rdlisneql pmlgrrpgap eskcsrgaly tgfsilvtll
   61 lagqattayf lyqqqgrldk ltvtsqnlql enlrmklpkp pkpvskmrma tp11mqalpm
  121 galpqgpmqn atkygnmte d hvmhllqnad plkvypplkg sfpnlrhk ntmetidkwv
  181 feswmhhwll femsrhsleq kptdappkes leledpssgl gvtkqdlgpv pm

```

#### Mouse li isoform 1 (p41)

```

1 mddqrdlisl heqlpilgnr prepercsrg alytgvsvlv alllagqatt ayflyqqqgr
   61 ldkltitsqn lqleslrmkl pksakpvsqm rmatp11mrp msmdnml1gp vknvtkygnm
  121 tqdhvmhllt rsgpleypql kgtfpenlkh lknsmdgvnw kifeswmkqw 1lfemsknsl
  181 eekkteapp kvltkcqeev shipavypga frpkcdengn ylplqchgst gycwcvfpng
  241 tevphtksrg rhncsepldm edlssglgvt rqlgqvtl

```

#### Mouse isoform 1 (p31)

```

1 mddqrdlisl heqlpilgnr prepercsrg alytgvsvlv alllagqatt ayflyqqqgr
   61 ldkltitsqn lqleslrmkl pksakpvsqm rmatp11mrp msmdnml1gp vknvtkygnm
  121 tqdhvmhllt rsgpleypql kgtfpenlkh lknsmdgvnw kifeswmkqw 1lfemsknsl
  181 eekkteapp kepldmedls sglgvtrqel gqvtl

```
